# Supplementary material
Source: PubMed Central journal article supplement (PMC2670176)
Supplement: M808991200_1.pdf [file M808991200_1.pdf]

**ONLINE SUPPLEMENTAL MATERIAL**

FIGURE S1. **Zebrafish *decorin***. *A*, amino acid alignment of human, mouse and zebrafish *decorin*. Alignment was constructed in Jalview (Clamp, M., Cuff, J., Searle, S. M. and Barton, G. J. (2004), "The Jalview Java Alignment Editor," *Bioinformatics*, 20, 426-7). Shading corresponds to percent identity among species. *B*, zebrafish *decorin* exon organization. *C*, zebrafish *decorin* is a chondroitin sulfate proteoglycan despite harboring the heparan sulfate attachment/consensus sequence, SGD. Compare the highlighted sequence from zebrafish *decorin* to a heparan sulfate attachment sequence found in human perlecan and to the predicted heparan sulfate attachment/consensus sequence. Note also the presence of shared amino acid residues upstream and downstream of the main SGD consensus. The corresponding region from human decorin is shown for comparison.

FIGURE S2. **Zebrafish *decorin* functional analysis**. *A*, conditioned media from 293-EBNA cells synthesizing zebrafish *decorin* binds collagen, fibronectin and laminin. *B*, Two-h treatment with zebrafish decorin decreases EGFR tyrosine kinase levels in HeLa cells. *C*, Zebrafish decorin inhibits tumor cell proliferation (\*\*\*,  $p = 0.001$ ). Panel *C* represents one of two independent experiments. *D*, Zebrafish decorin increases tumor cell apoptosis after a 24 h treatment (\*\*\*,  $p = 0.001$ ). The values presented in *C* and *D* represent the mean  $\pm$  S.E. ( $n = 6$ ).

FIGURE S3. **Zebrafish *decorin* expression profile**. A similar pattern of decorin expression has been determined by gene expression profiling (1).

FIGURE S4. **Zebrafish *decorin* immunohistochemistry**. Panel *A* represents immunostaining of 4 hpf uninjected embryos with anti-decorin antibody, and panel *B* represents immunostaining of injected embryos without primary antibody. *C*, human decorin proteoglycan can be detected by immunostaining of cryosections of 4 hpf injected embryos with goat anti-human decorin. Regions positive for decorin correspond to the Rhodamine (red) signal and nuclei are stained with DAPI (blue). Notice the pericellular localization of human decorin (white arrows). *Bar*, 25  $\mu$ m.

**References**

1. Ouyang, M., Garnett, A. T., Han, T. M., Hama, K., Lee, A., Deng, Y., Lee, N., Liu, H.-Y., Amacher, S. L., Farber, S. A., and Ho, S.-Y. (2008) *Gene Expr. Patterns* **8**, 171-180

**A**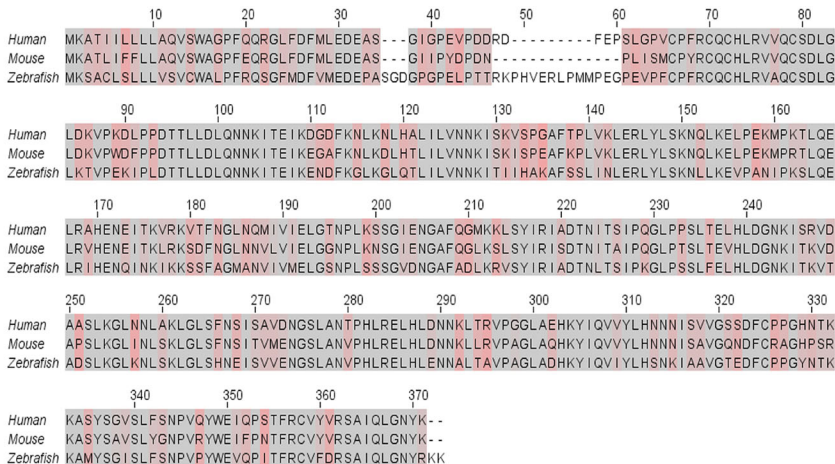**B**

| Exon | Nucleotides | Amino Acids |
|------|-------------|-------------|
| 1    | 1-267       | 1-83        |
| 2    | 268-378     | 84-120      |
| 3    | 379-591     | 121-191     |
| 4    | 592-708     | 192-230     |
| 5    | 709-801     | 231-261     |
| 6    | 802-942     | 262-308     |
| 7    | 943-1140    | 309-373     |

**C**

|                    |                      |
|--------------------|----------------------|
| Human decorin:     | EDEA <b>SG</b> IGPE  |
| Zebrafish decorin: | EDEPA <b>SGD</b> GPG |
| Human perlecan:    | DLG <b>SGD</b> LGS   |
| Predicted HS:      | EDE <b>GSGD</b> GP   |

Figure S1

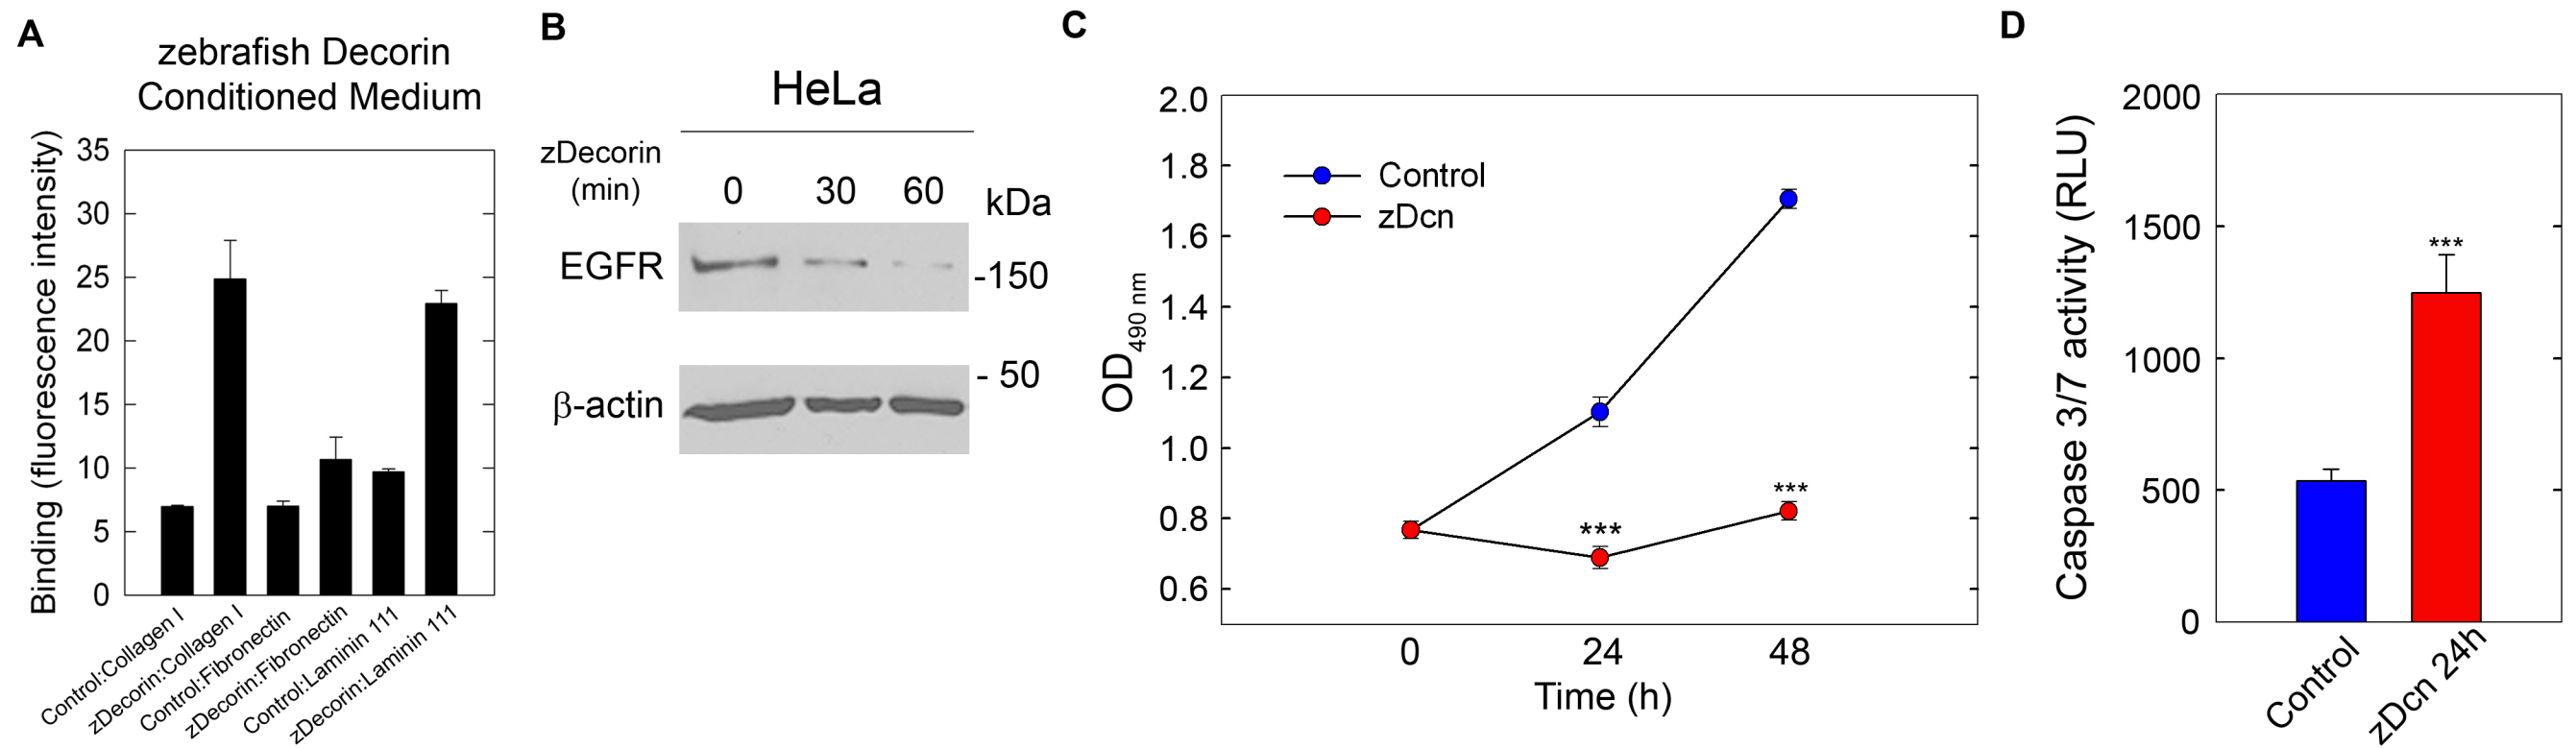

Figure S2

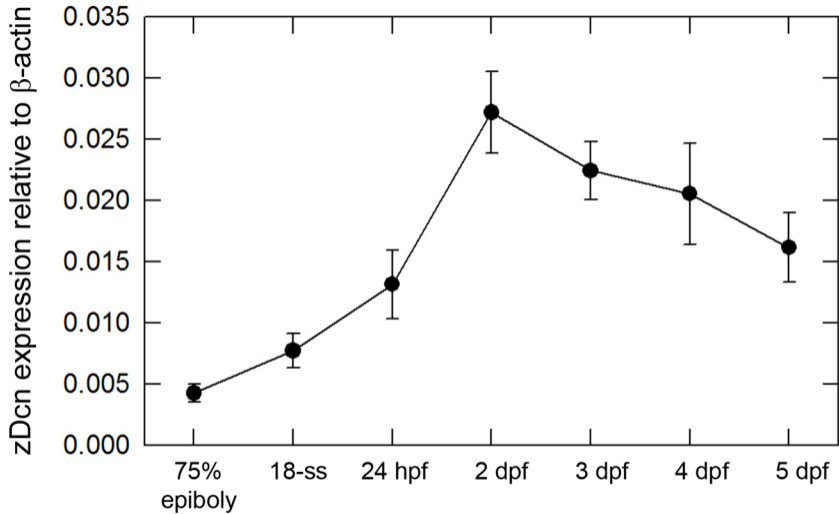

Figure S3

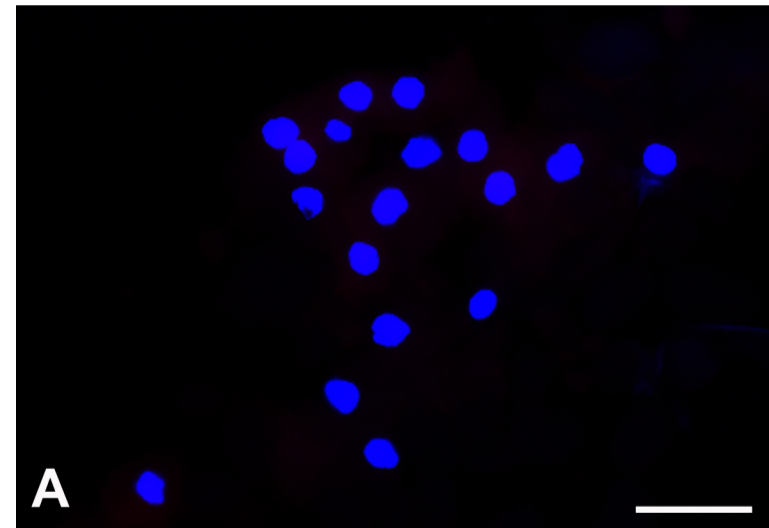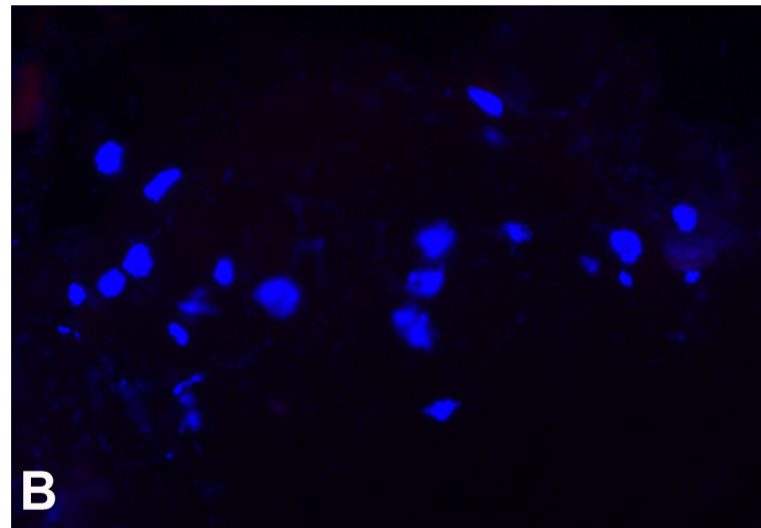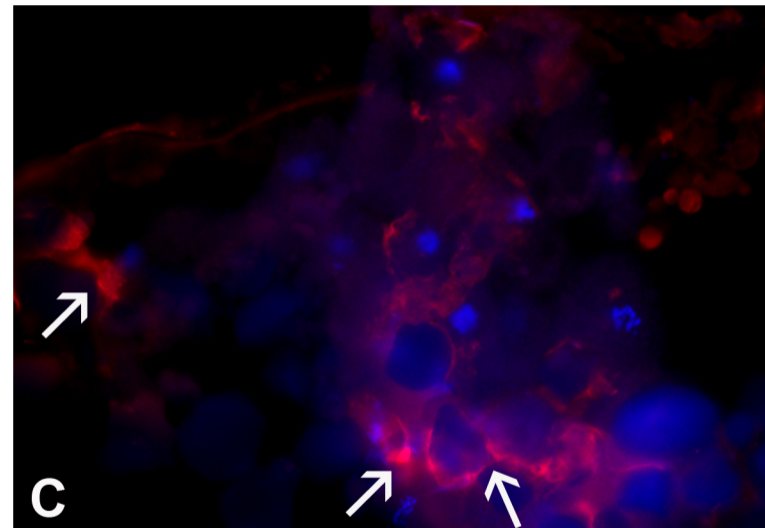

Figure S4
